# Supplementary material for: A thermally insulated solar evaporator coupled with a passive condenser for freshwater collection
Source: Royal Society of Chemistry journal article supplement (doi:10.1039/d1ta05781b), 2021-01-01
Supplement: d1ta05781b1.pdf [file d1ta05781b1.pdf]

## Supporting Information

### Thermally insulated solar evaporator coupled with passive condenser for freshwater collection

Shuwen Cheng,<sup>‡a</sup> Zhehao Sun,<sup>‡b</sup> Yang Wu,<sup>a</sup> Peng Gao,<sup>a</sup> Jiaxin He<sup>a</sup>, Zongyou Yin,<sup>b</sup>

Liyong Liu<sup>\*a</sup> and Gang Li<sup>\*c</sup>

<sup>a</sup>School of metallurgy, Northeastern University, Shenyang 100819, China.

<sup>b</sup>Research School of Chemistry, Australian National University, Canberra, ACT 2601, Australia.

<sup>c</sup>Department of Chemical Engineering, The University of Melbourne, Melbourne, Victoria 3010, Australia.

<sup>‡</sup>These authors contributed equally to this work.

#### \*Corresponding author

Email: liuly@smm.neu.edu.cn (Liyong Liu), li.g@unimelb.edu.au (Gang Li).

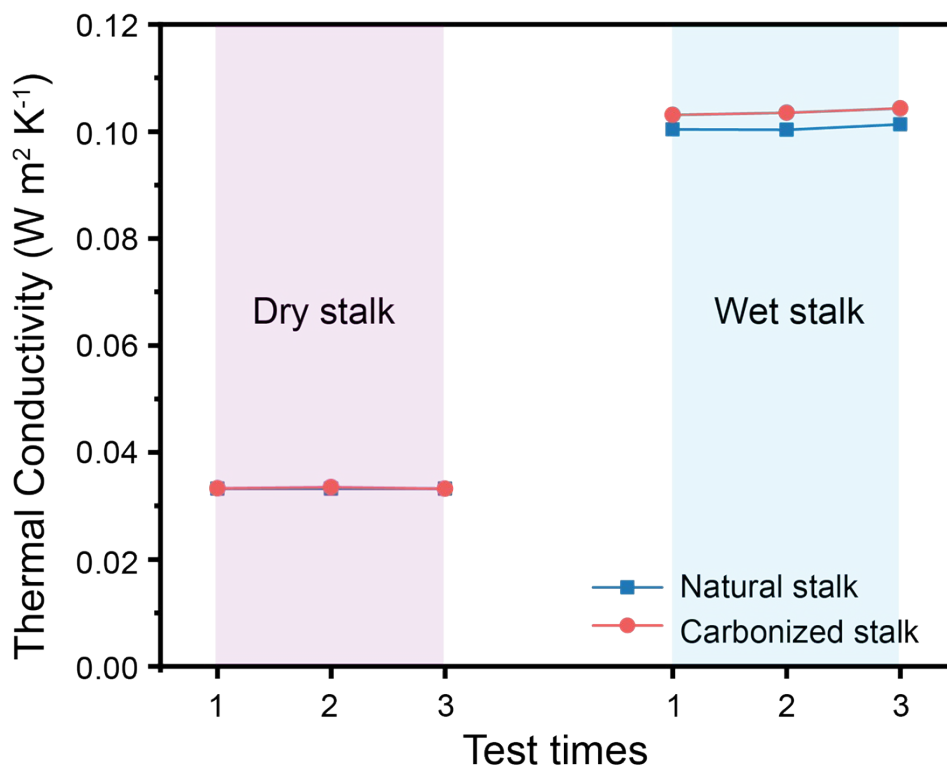

**Figure S1.** Measured thermal conductivities by hot-wire method under two experimental conditions (dry and wet).

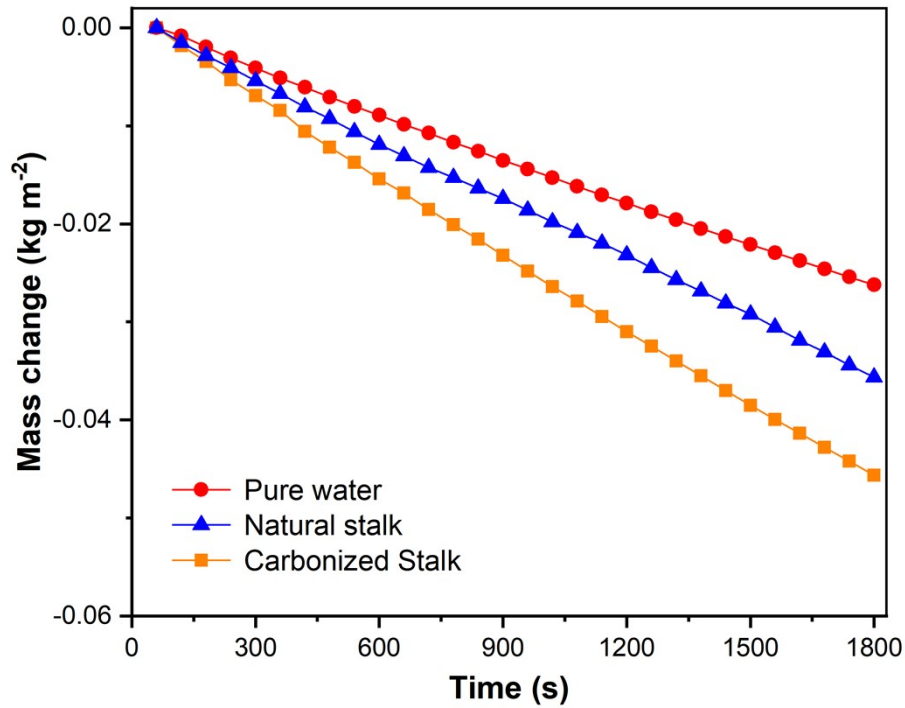

**Figure S2.** Mass change of water over time under dark condition ( $C_{opt}=0$ ).

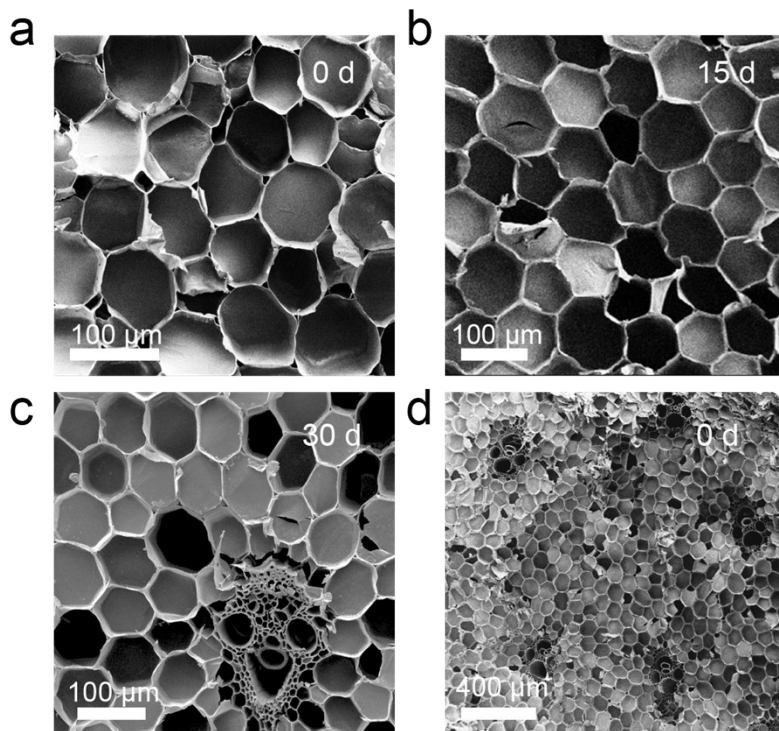

**Figure S3.** SEM images of natural stalk immersed in saltwater. (a) Immersed for 0 days: the top view of the tracheids' surface shows shapes of irregular hexagons. (b) Immersed for 15 days: the tracheid wall became more honeycomb-like with the increase of soaking time. (c) Immersed for 30 days: clear honeycomb tracheids and intact vascular bundles are shown. (d) Dense inner vascular bundles of reed stalk.

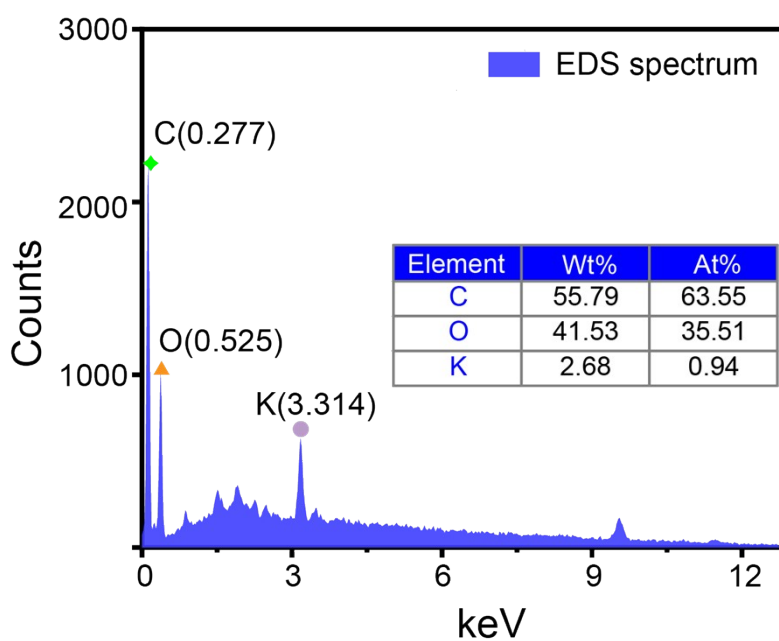

**Figure S4.** EDS spectrum of the natural reed stalk. Besides hydrogen, it is mainly composed of carbon, oxygen, and potassium, where potassium is a trace element, only 2.68wt%.

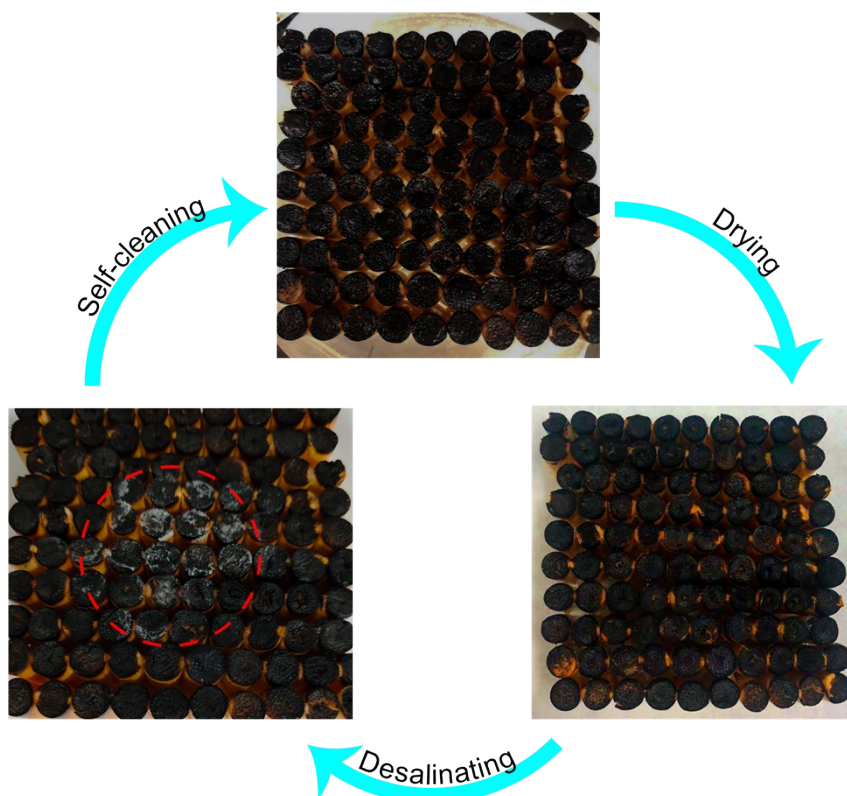

**Figure S5.** Images of the self-cleaning process (10×10 square array). Local salt deposition depends on the radiation radius of the light source.

### Equation of solar-to-vapor efficiency<sup>1</sup>:

$$\eta_{sv} = \frac{m_{net}(H_{LV} + C\Delta T)}{C_{opt}} \quad (S1)$$

$$H_{LV} = 1.91846 \times 10^3 \times \left[ \frac{T_2}{T_2 - 33.91} \right]^2 \text{ kJ kg}^{-1} \quad (S2)$$

Where  $m_{net}$  is the net evaporation rate under solar illumination (the evaporation rate under dark condition was subtracted),  $H_{LV}$  represents the latent heat of water vaporization,  $C$  denotes the specific heat capacity of water (normally  $4.2 \text{ kJ kg}^{-1} \text{ K}^{-1}$ ),  $\Delta T$  is the temperature rise from the initial temperature  $T_1$  to the maximum surface temperature  $T_2$ ,  $C_{opt}$  is the solar radiation power measured by an optical power meter ( $1000 \text{ W m}^{-2}$  was used in this paper).

### The analysis of heat loss:

The input heat flux is  $1 \text{ kW m}^{-2}$ , and five main strategies for energy consumption are as follows: (1) water evaporation, (2) reflection energy loss, (3) radiation heat loss, (4) convection heat loss, and (5) conductive heat loss.

#### (1) Water evaporation, $\eta_w$

The water evaporation consumption rate is equal to the evaporation efficiency; thus,  $\eta_w$  is **90.8%**.

#### (2) Reflection energy loss, $\eta_{ref,w}$

The solar absorption of a carbonized reed stalk is 96.8%; thus, the reflection loss  $\eta_{ref,w}$  is **21%**.

#### (3) Radiation heat loss, $\eta_{rad,w}$

The radiation heat loss was calculated according to Stefan-Boltzmann Equation S3.

$$\Phi = \varepsilon A \sigma (T_1^4 - T_2^4) \quad (S3)$$

where  $\Phi$  ( $\text{W m}^{-2}$ ) is the radiation heat flux,  $A$  ( $\text{m}^2$ ) is the surface area,  $\sigma$  is the Stefan-Boltzmann constant ( $5.67 \times 10^{-8} \text{ W m}^{-2} \text{ K}^{-4}$ ),  $\varepsilon$  is the emissivity of material supposed as the maximum emissivity of 1 in this paper,  $T_1$  (315.15 K) is the surface temperature of the carbonized reed stalk at steady state under 1 sun illumination, and  $T_2$  (310.15 K) is the ambient temperature upward the material under 1 sun illumination. Therefore, according to equation (S3), the radiation heat flux is  $34.6 \text{ W m}^{-2}$ , which is  $\sim 3.5\%$  of the solar flux  $\Phi_0$  (1 sun =  $1000 \text{ W m}^{-2}$ ).

#### (4) Convection heat loss, $\eta_{conv,w}$

The convection heat flux was calculated by Newton's law of cooling:

$$Q_1 = hA\Delta T \quad (S4)$$

where  $Q_1$  ( $\text{W m}^{-2}$ ) is the convection heat flux,  $h$  ( $10 \text{ W m}^{-2} \text{ K}^{-1}$ ) is the convection heat transfer coefficient, and  $\Delta T$  is the different value between the surface temperature and the ambient temperature upward the material under 1 sun illumination ( $\Delta T=5 \text{ K}$ ). According to Equation S5-S6, the convection heat flux is  $40 \text{ W m}^{-2}$ , which is  $\sim 5\%$  of solar energy.

(5) Conduction heat loss,  $\eta_{\text{cond,w}}$

The conduction heat flux was calculated according to the following Equation S5.

$$Q_2 = Cm\Delta T \quad (\text{S5})$$

where  $Q_2$  is heat loss,  $C$  is the specific heat capacity of water ( $4.2 \text{ J K}^{-1} \text{ g}^{-1}$ ),  $m$  (30 g) is the weight of water used in the paper, and  $\Delta T$  (0.3 K) is the temperature difference of pure water after and before solar illumination under 1 sun after 1 h. According mentioned above, the conduction heat loss was calculated  $\sim 20 \text{ W m}^{-2}$ , which is  $\sim 2\%$  of solar flux.

**Table S1.** Comparison of pore size of different biomass-derived materials.

| Biomass-derived materials  | Pore size ( $\mu\text{m}$ ) |
|----------------------------|-----------------------------|
| Sunflower <sup>2</sup>     | 10-40                       |
| Sugarcane <sup>3</sup>     | 20-100                      |
| Corn Straw <sup>4</sup>    | ~1.5                        |
| Mushroom <sup>5</sup>      | ~3.6                        |
| Lotus seedpod <sup>6</sup> | 0.016-1.46                  |
| Rice straw <sup>7</sup>    | 5-20                        |
| <b>This work</b>           | <b>1-60</b>                 |

**Table S2** Pore structure and porosity.

| Pore area<br>( $\text{m}^2 \text{g}^{-1}$ ) | Bulk density<br>( $\text{g cm}^{-3}$ ) | Apparent density<br>( $\text{g cm}^{-3}$ ) | Porosity<br>% | Average pore<br>diameter<br>( $\mu\text{m}$ ) | Opened<br>porosity % | Closed<br>porosity % |
|---------------------------------------------|----------------------------------------|--------------------------------------------|---------------|-----------------------------------------------|----------------------|----------------------|
| 41.07                                       | 0.0468                                 | 0.7579                                     | 93.83%        | 2                                             | 47.63%               | 46.20%               |

**Movie S1.** Capillary performance of reed stalk (removed the epidermis). This video highlights the superhydrophilicity of the carbonized reed stalk and ultrafast water transport in the stalk.

**Movie S2.** The superhydrophobic wax epidermis of reed stalk. This video highlights the superhydrophobic of the natural epidermis of reed stalk which can protect and ensure the salt tolerance in seawater.

**Movie S3.** The diffusion and convection traces of the concentrated brine from the surface of reed stalk evaporator arrays (RSEAs) to the brine underneath. This video intuitively embodies the self-cleaning performance of RSEAs.

## References

1. P. Tao, G. Ni, C. Song, W. Shang, J. Wu, J. Zhu, G. Chen and T. Deng, *Nature Energy*, 2018, **3**, 1031-1041.
2. P. Sun, W. Zhang, I. Zada, Y. Zhang, J. Gu, Q. Liu, H. Su, D. Pantelic, B. Jelenkovic and D. Zhang, *ACS applied materials & interfaces*, 2019, **12**, 2171-2179.
3. J. Liu, Q. Liu, D. Ma, Y. Yuan, J. Yao, W. Zhang, H. Su, Y. Su, J. Gu and D. Zhang, *Journal of Materials Chemistry A*, 2019, **7**, 9034-9039.
4. Z. Sun, W. Li, W. Song, L. Zhang and Z. Wang, *Journal of Materials Chemistry A*, 2020, **8**, 349-357.
5. N. Xu, X. Hu, W. Xu, X. Li, L. Zhou, S. Zhu and J. Zhu, *Adv Mater*, 2017, **29**.
6. J. Fang, J. Liu, J. Gu, Q. Liu, W. Zhang, H. Su and D. Zhang, *Chemistry of Materials*, 2018, **30**, 6217-6221.
7. Q. Fang, T. Li, Z. Chen, H. Lin, P. Wang and F. Liu, *ACS applied materials & interfaces*, 2019, **11**, 10672-10679.
